# Supplementary material for: The high-resolution global shipping emission inventory by the Shipping Emission Inventory Model (SEIM)
Source: Copernicus journal article supplement (doi:10.5194/essd-17-277-2025), 2025-01-28
Supplement: Supplementary file 1 [file essd-17-277-2025-supplement.pdf]

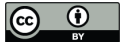

*Supplement of*

## **The high-resolution global shipping emission inventory by the Shipping Emission Inventory Model (SEIM)**

**Wen Yi et al.**

*Correspondence to:* Huan Liu ([liu\\_env@tsinghua.edu.cn](mailto:liu_env@tsinghua.edu.cn))

The copyright of individual parts of the supplement might differ from the article licence.

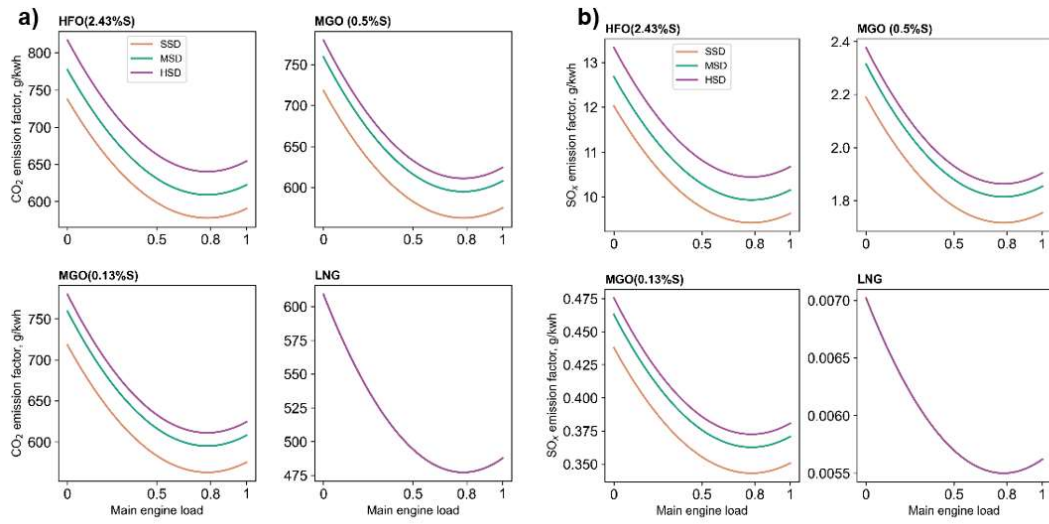

**Figure S1: a) CO<sub>2</sub> and b) SO<sub>2</sub> emission factors of different types of fuel as a function of main engine load.**

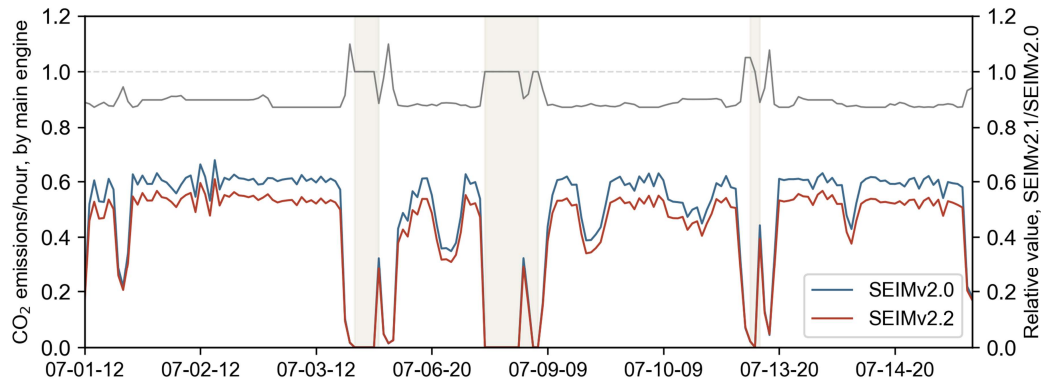

**Figure S2: Hourly CO<sub>2</sub> emissions of a typical oil tanker (MMSI code: 414404060) as estimated by SEIMv2.0 and SEIMv2.2.** The dark gray line represents the ratio of SEIMv2.2 calculated results to those of SEIMv2.0. The shaded gray regions highlight periods during which the vessel is either at anchorage or berth.

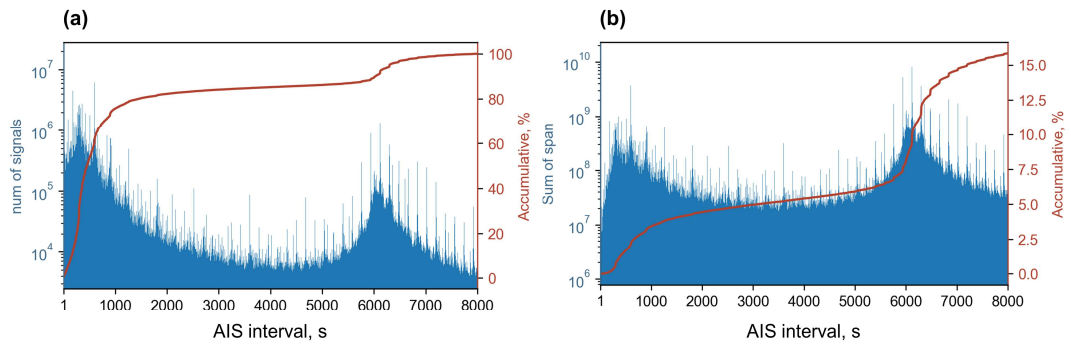

**Figure S3: AIS signals intervals frequency statistics.** a) Distribution of AIS signals counts; b) Distribution of cumulative AIS signal intervals.

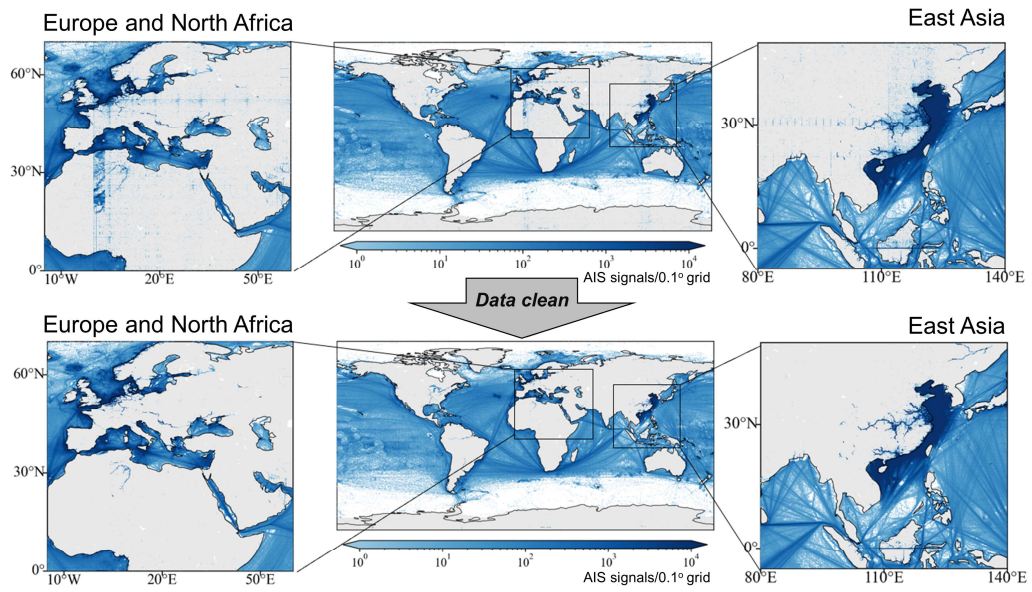

**Figure S4: Spatial distribution of ship AIS signals before and after spatial anomalies cleaning.**

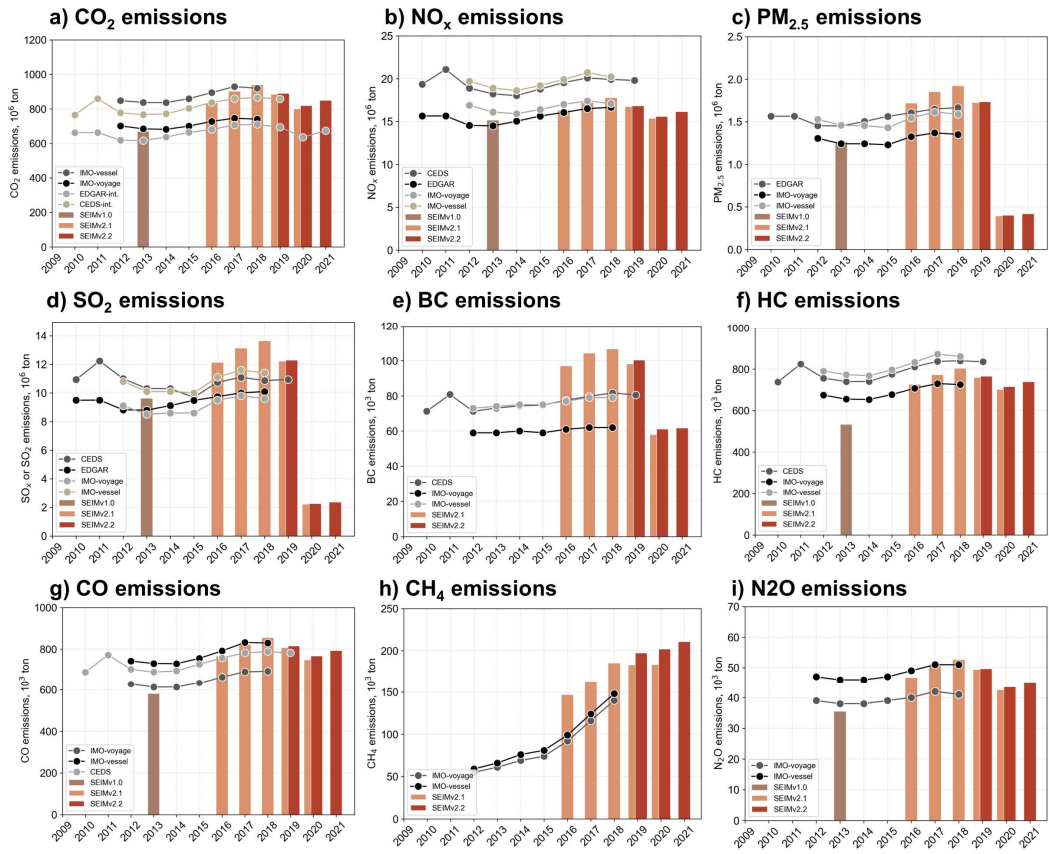

**Figure S5: Global trends in shipping emissions from 2010 to 2021 with results from different SEIM version and other data sources.**

**Table S1. Correction coefficients for draft and weather applied in this study**

| <b>Vessel category</b> | <b>Size (in dwt, unit: ton)</b> | <b>Average draft / design draft</b> | <b>Weather correction</b> |
|------------------------|---------------------------------|-------------------------------------|---------------------------|
| Auto carrier           | 0-9999                          | 0.961                               | 0.909                     |
|                        | 9999-+                          | 0.770                               | 0.867                     |
| Bulk carrier           | 0-9999                          | 0.664                               | 0.909                     |
|                        | 10000-34999                     | 0.746                               | 0.867                     |
|                        | 35000-59999                     | 0.723                               | 0.867                     |
|                        | 60000-99999                     | 0.678                               | 0.867                     |
|                        | 100000-199999                   | 0.740                               | 0.867                     |
|                        | 200000-+                        | 0.803                               | 0.867                     |
| Chemical tanker        | 0-4999                          | 0.961                               | 0.909                     |
|                        | 5000-9999                       | 0.816                               | 0.909                     |
|                        | 10000-19999                     | 0.762                               | 0.867                     |
|                        | 20000-+                         | 0.754                               | 0.867                     |
| Container              | 0-999                           | 0.586                               | 0.909                     |
|                        | 1000-1999                       | 0.473                               | 0.867                     |
|                        | 2000-2999                       | 0.410                               | 0.867                     |
|                        | 3000-4999                       | 0.363                               | 0.867                     |
|                        | 5000-7999                       | 0.676                               | 0.867                     |
|                        | 8000-11999                      | 0.652                               | 0.867                     |
|                        | 12000-14500                     | 0.645                               | 0.867                     |
|                        | 14500-+                         | 0.613                               | 0.867                     |
| Cruise                 | 0-+                             | 0.600                               | 0.909                     |
| Fishing ship           | 0-+                             | 0.600                               | 0.909                     |
| General cargo          | 0-4999                          | 0.961                               | 0.909                     |
|                        | 5000-9999                       | 0.816                               | 0.867                     |
|                        | 10000-+                         | 0.770                               | 0.867                     |
| Oil tanker             | 0-4999                          | 0.742                               | 0.909                     |
|                        | 5000-9999                       | 0.855                               | 0.909                     |
|                        | 10000-19999                     | 0.754                               | 0.867                     |
|                        | 20000-59999                     | 0.551                               | 0.867                     |
|                        | 60000-79999                     | 0.580                               | 0.867                     |
|                        | 80000-119999                    | 0.568                               | 0.867                     |
|                        | 120000-199999                   | 0.580                               | 0.867                     |
|                        | 200000-+                        | 0.635                               | 0.867                     |
| Other tanker           | 0-49999                         | 0.758                               | 0.867                     |
|                        | 50000-199999                    | 0.832                               | 0.867                     |
|                        | 200000-+                        | 0.832                               | 0.867                     |
| Others                 | 0-+                             | 0.600                               | 0.867                     |

**Table S2. Chemical component of ship-used fuel and corresponding fuel-based emission factors for CO<sub>2</sub>, SO<sub>2</sub> and PM<sub>2.5</sub>.**

| Fuel          | Carbon content (m/m%) | EF <sub>CO<sub>2</sub>,f</sub> (g/gfuel) | Sulfur content (m/m%) | EF <sub>SO<sub>2</sub>,f</sub> (g/gfuel) | EF <sub>PM<sub>2.5</sub>,e</sub> (g/kwh) |                  |        |
|---------------|-----------------------|------------------------------------------|-----------------------|------------------------------------------|------------------------------------------|------------------|--------|
|               |                       |                                          |                       |                                          | Main Engine                              | Auxiliary Engine | Boiler |
| HFO (2.43% S) | 0.8493                | 3.114                                    | 2.6                   | 0.051                                    | 1.39                                     | 1.4              | 1.42   |
| MGO (0.5% S)  | 0.8744                | 3.206                                    | 0.5                   | 0.0098                                   | 0.31                                     | 0.31             | 0.31   |
| MGO (0.13% S) | 0.8744                | 3.206                                    | 0.13                  | 0.0025                                   | 0.2                                      | 0.2              | 0.2    |
| LNG           | 0.75                  | 2.750                                    | ~ 0                   | 0.0000317 <sup>a</sup>                   | 0.02                                     | 0.02             | 0.03   |



**Table S3.  $SFC_{base}$  applied in this study (unit: g/kwh)**

| Fuel | Built year of engine | Main engine      |                  |                  | Auxiliary engine | Boiler |
|------|----------------------|------------------|------------------|------------------|------------------|--------|
|      |                      | SSD <sup>a</sup> | MSD <sup>b</sup> | HSD <sup>c</sup> |                  |        |
| HFO  | ≤2000                | 185              | 195              | 205              | 205              | 340    |
|      | >2000                | 175              | 185              | 195              | 195              | 340    |
| MGO  | ≤2000                | 175              | 185              | 190              | 190              | 320    |
|      | >2000                | 165              | 175              | 185              | 185              | 320    |
| LNG  | ≤2000                | 173              | 173              | 173              | 173              | 285    |
|      | >2000                | 122              | 122              | 122              | 156              | 285    |

<sup>a,b,c</sup> refers to Slow-Speed Diesel, Medium-Speed Diesel, High-Speed Diesel, respectively

**Table S4. Emission factors for specific air pollutants and GHGs applied in this study (unit: g/kwh)**

|                         | Main Engine |       |       | LNG                  | Auxiliary Engine |      | Boiler       |       |
|-------------------------|-------------|-------|-------|----------------------|------------------|------|--------------|-------|
|                         | HFO/MGO     |       |       |                      | HFO/MGO /GDO     | LNG  | HFO/MGO /GDO | LNG   |
|                         | SSD         | MSD   | HSD   |                      |                  |      |              |       |
| NO <sub>x</sub> (Tier0) | 18.1        | 14    | 10    |                      |                  |      |              |       |
| NO <sub>x</sub> (Tier1) | 17          | 13    | 9.8   | 1.3                  | 11.2             | 1.3  | 2.1          | 1.3   |
| NO <sub>x</sub> (Tier2) | 14.4        | 10.5  | 7.7   |                      |                  |      |              |       |
| NO <sub>x</sub> (Tier3) | 3.4         | 2.6   | 2     |                      |                  |      |              |       |
| CO                      | 0.54        | 0.54  | 0.54  | 1.3                  | 0.54             | 1.3  | 0.2          | 0.2   |
| HC                      | 0.632       | 0.527 | 0.527 | 0.5                  | 0.4              | 0.5  | 0.1          | 0.105 |
| CH <sub>4</sub>         | 0.01        | 0.01  | 0.01  | 2.5/5.5 <sup>a</sup> | 0.01             | 5.5  | 0.002        | 0.04  |
| N <sub>2</sub> O        | 0.03        | 0.03  | 0.03  | 0.02                 | 0.04             | 0.02 | 0.045        | 0.02  |

<sup>a</sup>2.5 for SSD, 5.5 for MSD / HSD

**Table S5. Energy-based emission factors for BC (g/kwh)**

| Main engine load (%) | HFO   |         |       | MDO/MGO |         |       | LNG   |
|----------------------|-------|---------|-------|---------|---------|-------|-------|
|                      | SSD   | MSD/HSD | AE/BE | SSD     | MSD/HSD | AE/BE |       |
| (0,5]                | 0.077 | 0.746   | 0.08  | 0.002   | 0.61    | 0.06  | 0.003 |
| (5,10]               | 0.060 | 0.381   | 0.08  | 0.001   | 0.28    | 0.06  | 0.003 |
| (10,20]              | 0.047 | 0.195   | 0.08  | 0.001   | 0.13    | 0.06  | 0.003 |
| (20,30]              | 0.040 | 0.132   | 0.08  | 0.001   | 0.08    | 0.06  | 0.003 |
| (30,40]              | 0.037 | 0.099   | 0.08  | 0.001   | 0.06    | 0.06  | 0.003 |
| (40,50]              | 0.033 | 0.081   | 0.08  | 0.001   | 0.05    | 0.06  | 0.003 |
| (50,60]              | 0.032 | 0.068   | 0.08  | 0.001   | 0.04    | 0.06  | 0.003 |
| (60,70]              | 0.030 | 0.058   | 0.08  | 0.001   | 0.03    | 0.06  | 0.003 |
| (70,80]              | 0.028 | 0.051   | 0.08  | 0.000   | 0.03    | 0.06  | 0.003 |
| (80,90]              | 0.028 | 0.046   | 0.08  | 0.000   | 0.02    | 0.06  | 0.003 |
| (90,100]             | 0.026 | 0.041   | 0.08  | 0.000   | 0.02    | 0.06  | 0.003 |
